# Supplementary material
Source: PubMed Central journal article supplement (PMC4715546)
Supplement: NIHMS726206-supplement-Supp_MaterialS1.pdf [file NIHMS726206-supplement-Supp_MaterialS1.pdf]

1. Predicted pKa values on PPD (Protein pKa Database) dataset with optimal parameters  $\epsilon_{ref} = 8, \sigma = 0.70$ . The calculations are performed with AMBER, CHARMM and PARSE force fields, respectively.

| PDB_NAME | RES_NAME | RES_NUM | EXP_Value | AMBER | CHARMM | PARSE |
|----------|----------|---------|-----------|-------|--------|-------|
| 1A2P     | ASP      | 8       | 3.3       | 3.39  | 3.3    | 3.84  |
| 1A2P     | ASP      | 12      | 3.8       | 3.45  | 3.96   | 3.56  |
| 1A2P     | ASP      | 22      | 3.3       | 3.61  | 3.59   | 3.83  |
| 1A2P     | ASP      | 44      | 3.4       | 3.74  | 3.79   | 4.17  |
| 1A2P     | ASP      | 54      | 2.2       | 2.71  | 2.23   | 2.19  |
| 1A2P     | ASP      | 75      | 3.1       | 2.35  | 1.96   | 1.89  |
| 1A2P     | ASP      | 86      | 4.2       | 3.39  | 3.45   | 3.69  |
| 1A2P     | ASP      | 93      | 2         | 2.7   | 2.57   | 1.92  |
| 1A2P     | ASP      | 101     | 2         | 2.71  | 2.39   | 0.69  |
| 1A2P     | GLU      | 29      | 3.8       | 4.48  | 4.45   | 4.17  |
| 1A2P     | GLU      | 60      | 3         | 3.97  | 3.46   | 3.51  |
| 1A2P     | GLU      | 73      | 2.2       | 3.8   | 3.58   | 3.54  |
| 1A2P     | HIS      | 18      | 7.7       | 6.8   | 6.81   | 6.87  |
| 1A2P     | HIS      | 102     | 6.3       | 6.26  | 6.5    | 6.69  |
| 1A6K     | HIS      | 12      | 6.5       | 6.79  | 7.04   | 6.94  |
| 1A6K     | HIS      | 24      | 5         | 6.27  | 6.61   | 5.5   |
| 1A6K     | HIS      | 36      | 8         | 6.83  | 7.11   | 7.16  |
| 1A6K     | HIS      | 48      | 5.6       | 6.28  | 6.53   | 6.19  |
| 1A6K     | HIS      | 64      | 5         | 5.86  | 5.55   | 5.86  |
| 1A6K     | HIS      | 81      | 6.9       | 6.77  | 6.87   | 6.79  |
| 1A6K     | HIS      | 82      | 5         | 7.15  | 7.8    | 7.02  |
| 1A6K     | HIS      | 97      | 5.6       | 5.62  | 5.47   | 5.48  |
| 1A6K     | HIS      | 113     | 5.4       | 6.31  | 6.35   | 5.97  |
| 1A6K     | HIS      | 116     | 6.7       | 6.51  | 6.5    | 6.54  |
| 1A6K     | HIS      | 119     | 6.2       | 5.49  | 5.93   | 5.21  |
| 1BEO     | ASP      | 21      | 2.5       | 3.26  | 2.49   | 2.31  |
| 1BEO     | ASP      | 30      | 2.5       | 3.65  | 3.46   | 3.83  |
| 1BEO     | ASP      | 72      | 2.6       | 3.75  | 3.74   | 4.16  |
| 1BEO     | LYS      | 61      | 10.4      | 10.06 | 10.08  | 10.07 |
| 1BEO     | LYS      | 94      | 9.4       | 9.97  | 10.01  | 10.08 |
| 1DG9     | HIS      | 66      | 8.3       | 7.04  | 7.2    | 7.15  |
| 1DWR     | HIS      | 36      | 7.8       | 6.77  | 7      | 7.04  |
| 1DWR     | HIS      | 48      | 5.6       | 6.51  | 6.52   | 6.29  |
| 1DWR     | HIS      | 81      | 6.9       | 6.47  | 6.28   | 6.28  |
| 1DWR     | HIS      | 113     | 5.9       | 6.1   | 6.05   | 5.91  |
| 1DWR     | HIS      | 116     | 6.8       | 6.23  | 6.16   | 6.18  |
| 1DWR     | HIS      | 119     | 6.6       | 6.03  | 6.58   | 6.1   |
| 1ERT     | ASP      | 16      | 4         | 4     | 4.12   | 4.48  |
| 1ERT     | ASP      | 20      | 3.8       | 3.61  | 3.61   | 3.83  |
| 1ERT     | ASP      | 58      | 2.8       | 3.88  | 4.25   | 3.16  |
| 1ERT     | ASP      | 60      | 4.2       | 3.59  | 3.72   | 3.83  |
| 1ERT     | ASP      | 61      | 5.3       | 4.07  | 4.57   | 4.79  |
| 1ERT     | ASP      | 64      | 3.2       | 3.41  | 3.42   | 3.2   |
| 1ERT     | GLU      | 6       | 4.8       | 5.18  | 5.31   | 5.58  |
| 1ERT     | GLU      | 13      | 4.4       | 4.86  | 4.55   | 4.89  |
| 1ERT     | GLU      | 47      | 4.1       | 4.54  | 4.15   | 4.45  |
| 1ERT     | GLU      | 56      | 3.1       | 4.64  | 5      | 4.77  |

|      |     |     |      |       |       |       |
|------|-----|-----|------|-------|-------|-------|
| 1ERT | GLU | 68  | 4.9  | 4.53  | 4.32  | 4.56  |
| 1ERT | GLU | 70  | 4.6  | 4.8   | 4.55  | 4.81  |
| 1ERT | GLU | 88  | 3.7  | 4.17  | 3.64  | 3.91  |
| 1ERT | GLU | 95  | 4.1  | 4.57  | 4.27  | 4.53  |
| 1ERT | GLU | 98  | 3.9  | 4.11  | 3.61  | 3.95  |
| 1ERT | GLU | 103 | 4.4  | 5     | 4.79  | 5.1   |
| 1ERT | HIS | 43  | 5.5  | 6.84  | 7.01  | 6.89  |
| 1ERU | ASP | 16  | 4.2  | 4.02  | 4.3   | 4.58  |
| 1ERU | ASP | 20  | 3.8  | 3.59  | 3.71  | 3.87  |
| 1ERU | ASP | 58  | 2.7  | 3.92  | 4.46  | 3.44  |
| 1ERU | ASP | 60  | 3.9  | 3.38  | 3.02  | 3.36  |
| 1ERU | ASP | 61  | 5.2  | 3.98  | 4.29  | 4.79  |
| 1ERU | ASP | 64  | 3.2  | 3.67  | 3.68  | 3.54  |
| 1ERU | GLU | 6   | 4.9  | 5.05  | 5.22  | 5.55  |
| 1ERU | GLU | 13  | 4.4  | 4.86  | 4.64  | 4.88  |
| 1ERU | GLU | 47  | 4.3  | 4.52  | 4.1   | 4.24  |
| 1ERU | GLU | 56  | 3.2  | 4.67  | 4.77  | 4.66  |
| 1ERU | GLU | 68  | 5.1  | 4.71  | 4.54  | 4.95  |
| 1ERU | GLU | 70  | 4.8  | 4.59  | 4.54  | 4.58  |
| 1ERU | GLU | 88  | 3.6  | 4.36  | 3.65  | 3.98  |
| 1ERU | GLU | 95  | 4.1  | 4.5   | 4.14  | 4.22  |
| 1ERU | GLU | 98  | 3.9  | 4.09  | 3.62  | 3.94  |
| 1ERU | GLU | 103 | 4.5  | 4.95  | 4.73  | 5.04  |
| 1FKS | HIS | 87  | 5.9  | 6.48  | 6.26  | 6.29  |
| 1FKS | HIS | 94  | 5.8  | 6.28  | 6.27  | 6.19  |
| 1GOA | ASP | 70  | 2.6  | 3.23  | 3.36  | 3.38  |
| 1GOA | ASP | 95  | 3.2  | 3.26  | 2.97  | 2.88  |
| 1GOA | ASP | 103 | 2    | 2.39  | 1.66  | 2.04  |
| 1GOA | ASP | 109 | 3.2  | 3.2   | 2.71  | 2.92  |
| 1GOA | ASP | 135 | 4.3  | 3.38  | 3.05  | 3.31  |
| 1GOA | ASP | 149 | 2    | 2.51  | 2.35  | 1.79  |
| 1GOA | GLU | 6   | 4.5  | 4.09  | 3.73  | 3.8   |
| 1GOA | GLU | 32  | 3.6  | 3.91  | 3.49  | 3.81  |
| 1GOA | GLU | 48  | 4.4  | 3.81  | 3.18  | 3.2   |
| 1GOA | GLU | 57  | 3.2  | 3.51  | 3.39  | 3.27  |
| 1GOA | GLU | 61  | 3.9  | 4.42  | 3.89  | 4.18  |
| 1GOA | GLU | 64  | 4.4  | 4.51  | 4.19  | 4.53  |
| 1GOA | GLU | 120 | 4.1  | 4.15  | 3.52  | 4.03  |
| 1GOA | GLU | 130 | 3.6  | 4.28  | 3.67  | 3.66  |
| 1GOA | GLU | 132 | 4.3  | 4.58  | 4.11  | 4.4   |
| 1GOA | GLU | 136 | 4.3  | 4.64  | 4.68  | 4.64  |
| 1GOA | GLU | 148 | 4.2  | 4.83  | 4.48  | 4.75  |
| 1GOA | GLU | 155 | 4.4  | 4.55  | 4.12  | 4.55  |
| 1GOA | HIS | 62  | 7    | 6.5   | 6.5   | 6.57  |
| 1GOA | HIS | 84  | 5.5  | 5.98  | 5.95  | 5.85  |
| 1GOA | HIS | 115 | 5    | 6.52  | 6.52  | 6.22  |
| 1GOA | HIS | 125 | 7.1  | 7.12  | 7.57  | 7.26  |
| 1GOA | HIS | 128 | 7.9  | 6.94  | 7.13  | 7.1   |
| 1GS9 | LYS | 69  | 10.1 | 10.18 | 10.76 | 10.45 |
| 1GS9 | LYS | 72  | 10   | 10.16 | 10.49 | 10.13 |
| 1GS9 | LYS | 75  | 10   | 10.77 | 11.22 | 10.88 |
| 1GS9 | LYS | 95  | 10   | 10.06 | 10.13 | 10.11 |
| 1GS9 | LYS | 143 | 9.4  | 9.79  | 9.86  | 9.62  |

|      |     |     |      |       |       |       |
|------|-----|-----|------|-------|-------|-------|
| 1GS9 | LYS | 146 | 9.9  | 9.55  | 9.59  | 9.54  |
| 1GS9 | LYS | 157 | 10.9 | 10.13 | 10.32 | 10.29 |
| 1H4G | ASP | 5   | 3.8  | 3.64  | 3.61  | 3.9   |
| 1H4G | ASP | 15  | 3.4  | 3.08  | 2.71  | 2.93  |
| 1H4G | ASP | 21  | 3.5  | 3.01  | 2.78  | 2.47  |
| 1H4G | ASP | 90  | 3.9  | 3.72  | 3.71  | 4.2   |
| 1H4G | ASP | 99  | 2.7  | 2.74  | 2.55  | 2.48  |
| 1H4G | ASP | 118 | 2.7  | 2.48  | 2.26  | 2.12  |
| 1H4G | ASP | 123 | 2.7  | 2.65  | 2.48  | 2.75  |
| 1H4G | GLU | 17  | 4.3  | 4.35  | 4.01  | 3.79  |
| 1H4G | GLU | 94  | 3.9  | 3.99  | 3.96  | 3.91  |
| 1H4G | GLU | 126 | 4.5  | 3.99  | 3.44  | 3.51  |
| 1H4G | GLU | 167 | 3.6  | 3.81  | 3.5   | 3.68  |
| 1H4G | GLU | 178 | 4.1  | 3.66  | 3.17  | 3.24  |
| 1H4G | GLU | 184 | 6.5  | 4.53  | 4.2   | 5.5   |
| 1H4G | HIS | 11  | 6.5  | 6.21  | 6.24  | 6.17  |
| 1H4G | HIS | 32  | 6.7  | 6.48  | 6.5   | 6.28  |
| 1HNG | ASP | 25  | 3.5  | 3.66  | 3.57  | 4.01  |
| 1HNG | ASP | 26  | 3.6  | 3.77  | 3.97  | 4.11  |
| 1HNG | ASP | 28  | 3.6  | 3.23  | 3.05  | 3.37  |
| 1HNG | ASP | 62  | 4.2  | 3.49  | 3.35  | 3.7   |
| 1HNG | ASP | 71  | 3.2  | 3.68  | 3.98  | 4.21  |
| 1HNG | ASP | 72  | 4.1  | 3.47  | 3.51  | 3.8   |
| 1HNG | ASP | 94  | 3.8  | 3.63  | 3.73  | 3.83  |
| 1HNG | GLU | 29  | 4.5  | 4.45  | 4.17  | 3.7   |
| 1HNG | GLU | 33  | 4.2  | 4.48  | 4.18  | 4.48  |
| 1HNG | GLU | 41  | 6.5  | 4.53  | 4.36  | 5.35  |
| 1HNG | GLU | 56  | 4    | 4.16  | 3.79  | 3.92  |
| 1HNG | GLU | 99  | 4.1  | 4.15  | 3.78  | 4.03  |
| 1IOV | ASP | 15  | 3.5  | 3.73  | 3.9   | 3.77  |
| 1IOV | ASP | 29  | 4.3  | 4.03  | 4.51  | 4.67  |
| 1IOV | ASP | 49  | 4.2  | 4.07  | 4.26  | 4.76  |
| 1IOV | ASP | 66  | 3.9  | 3.96  | 3.92  | 4.2   |
| 1IOV | GLU | 28  | 5.6  | 4.99  | 4.7   | 4.98  |
| 1IOV | GLU | 31  | 5.4  | 4.92  | 4.84  | 5.06  |
| 1IOV | GLU | 46  | 3.6  | 4.06  | 3.62  | 3.87  |
| 1IOV | GLU | 58  | 4    | 3.78  | 3.18  | 3.08  |
| 1IOV | GLU | 82  | 3.3  | 4.09  | 3.74  | 3.93  |
| 1IOV | GLU | 102 | 5.3  | 4.89  | 4.59  | 4.91  |
| 1IOV | HIS | 27  | 7    | 7.84  | 8.18  | 8.04  |
| 1IOV | HIS | 40  | 7.9  | 6.88  | 7.27  | 7.06  |
| 1IOV | HIS | 92  | 7.3  | 6.94  | 7     | 6.94  |
| 1IG5 | ASP | 47  | 3    | 3.25  | 3.02  | 3.09  |
| 1IG5 | GLU | 4   | 3.8  | 4.25  | 3.79  | 3.98  |
| 1IG5 | GLU | 5   | 3.4  | 4.44  | 4.08  | 4.02  |
| 1IG5 | GLU | 11  | 4.7  | 4.86  | 4.65  | 4.64  |
| 1IG5 | GLU | 17  | 3.5  | 5.04  | 5.3   | 5.02  |
| 1IG5 | GLU | 26  | 4.1  | 4.58  | 4.21  | 4.47  |
| 1IG5 | GLU | 48  | 4.6  | 4.57  | 4.37  | 4.55  |
| 1IG5 | GLU | 64  | 3.8  | 4.14  | 3.74  | 3.91  |
| 1IG5 | LYS | 7   | 11.4 | 10.79 | 10.96 | 10.89 |
| 1IG5 | LYS | 12  | 11.1 | 10.91 | 11.16 | 10.76 |
| 1IG5 | LYS | 16  | 10.1 | 10.54 | 10.74 | 10.8  |

|      |     |     |      |       |       |       |
|------|-----|-----|------|-------|-------|-------|
| 1IG5 | LYS | 25  | 11.7 | 11.22 | 11.79 | 11.46 |
| 1IG5 | LYS | 29  | 11.4 | 10.46 | 10.54 | 10.41 |
| 1IG5 | LYS | 41  | 10.9 | 10.14 | 10.14 | 10.14 |
| 1IG5 | LYS | 55  | 12.1 | 10.96 | 11.32 | 11.06 |
| 1IG5 | LYS | 71  | 10.7 | 10.02 | 10.02 | 9.98  |
| 1IG5 | LYS | 72  | 11.3 | 10.23 | 10.4  | 10.2  |
| 1IGD | ASP | 27  | 2.9  | 3.22  | 2.98  | 2.48  |
| 1IGD | ASP | 41  | 3.9  | 3.95  | 3.74  | 4.16  |
| 1IGD | ASP | 45  | 4    | 4.02  | 4.34  | 4.81  |
| 1IGD | ASP | 51  | 3.6  | 3.55  | 3.49  | 3.12  |
| 1IGD | ASP | 52  | 3.4  | 3.37  | 2.99  | 3.43  |
| 1IGD | GLU | 20  | 4.3  | 4.44  | 3.88  | 4.1   |
| 1IGD | GLU | 29  | 4.2  | 4.45  | 3.84  | 4.21  |
| 1IGD | GLU | 32  | 4.6  | 4.47  | 4.08  | 4.17  |
| 1IGD | LYS | 9   | 11   | 10.7  | 10.92 | 10.86 |
| 1IGD | LYS | 15  | 11   | 10.45 | 10.69 | 10.5  |
| 1IGD | LYS | 18  | 11   | 10.14 | 10.21 | 10.26 |
| 1IGD | LYS | 24  | 11   | 10.1  | 10.11 | 10.01 |
| 1IGD | LYS | 33  | 11   | 10.8  | 11.26 | 10.98 |
| 1JIC | ASP | 15  | 2.9  | 3.41  | 3.03  | 3.14  |
| 1JIC | ASP | 34  | 2.6  | 3.26  | 2.96  | 2.98  |
| 1JIC | ASP | 49  | 3    | 3.35  | 3.23  | 3.3   |
| 1JIC | GLU | 10  | 3.5  | 4.23  | 3.79  | 3.99  |
| 1JIC | GLU | 11  | 3.5  | 4.5   | 4.21  | 4.45  |
| 1JIC | GLU | 35  | 5.4  | 4.72  | 4.52  | 4.72  |
| 1JIC | GLU | 47  | 3.5  | 4.2   | 3.91  | 4.42  |
| 1JIC | GLU | 53  | 3.2  | 4.73  | 4.17  | 4.44  |
| 1JIC | GLU | 59  | 4.1  | 4.77  | 4.5   | 4.78  |
| 1JIC | LYS | 6   | 12   | 10.7  | 10.87 | 10.73 |
| 1JIC | LYS | 12  | 10   | 10.54 | 10.95 | 10.81 |
| 1JIC | LYS | 18  | 10   | 10.51 | 10.9  | 10.78 |
| 1KXI | ASP | 42  | 3.2  | 3.28  | 2.63  | 2.7   |
| 1KXI | ASP | 59  | 2.3  | 3.35  | 3.02  | 2.83  |
| 1KXI | GLU | 17  | 4    | 4.74  | 4.2   | 4.53  |
| 1KXI | HIS | 4   | 5.6  | 6.16  | 6.22  | 6.09  |
| 1LE2 | LYS | 69  | 10.1 | 10.29 | 10.82 | 10.73 |
| 1LE2 | LYS | 72  | 10   | 9.99  | 10.05 | 10.06 |
| 1LE2 | LYS | 75  | 10   | 10.5  | 10.84 | 10.58 |
| 1LE2 | LYS | 95  | 10   | 10.02 | 10.08 | 9.98  |
| 1LE2 | LYS | 143 | 9.4  | 9.45  | 9.59  | 9.42  |
| 1LE2 | LYS | 146 | 9.9  | 9.69  | 9.83  | 9.73  |
| 1LE2 | LYS | 157 | 10.9 | 10.3  | 10.74 | 10.79 |
| 1NFN | LYS | 69  | 10.4 | 10.29 | 10.92 | 10.73 |
| 1NFN | LYS | 72  | 10   | 10.11 | 10.24 | 10.19 |
| 1NFN | LYS | 75  | 10.1 | 10.23 | 10.72 | 10.44 |
| 1NFN | LYS | 95  | 10.1 | 9.98  | 10.06 | 10.04 |
| 1NFN | LYS | 143 | 9.5  | 9.83  | 9.89  | 9.78  |
| 1NFN | LYS | 146 | 9.9  | 9.52  | 9.73  | 9.56  |
| 1NFN | LYS | 157 | 11.1 | 10.22 | 10.85 | 10.8  |
| 1PGB | ASP | 22  | 2.9  | 3.05  | 2.58  | 2.15  |
| 1PGB | ASP | 36  | 3.8  | 3.99  | 4.06  | 4.48  |
| 1PGB | ASP | 40  | 4    | 4.05  | 4.48  | 4.94  |
| 1PGB | ASP | 46  | 3.6  | 3.54  | 3.57  | 3.51  |

|      |     |     |     |       |       |       |
|------|-----|-----|-----|-------|-------|-------|
| 1PGB | ASP | 47  | 3.4 | 3.49  | 3.33  | 3.5   |
| 1PGB | GLU | 15  | 4.4 | 4.25  | 3.52  | 3.77  |
| 1PGB | GLU | 19  | 3.7 | 4.88  | 4.67  | 4.83  |
| 1PGB | GLU | 27  | 4.5 | 4.42  | 3.8   | 4.03  |
| 1PGB | LYS | 4   | 11  | 10.88 | 11.54 | 11.18 |
| 1PGB | LYS | 10  | 11  | 10.22 | 10.29 | 10.17 |
| 1PGB | LYS | 13  | 11  | 10.8  | 10.99 | 10.88 |
| 1PGB | LYS | 28  | 11  | 10.23 | 10.31 | 10.21 |
| 1PPF | ASP | 7   | 2.6 | 3.68  | 3.59  | 3.82  |
| 1PPF | ASP | 27  | 2.3 | 3.36  | 3.25  | 2.98  |
| 1PPF | GLU | 10  | 4.2 | 4.19  | 3.87  | 4.09  |
| 1PPF | GLU | 19  | 3.2 | 3.42  | 2.61  | 2.82  |
| 1PPF | GLU | 43  | 3.8 | 4.77  | 4.53  | 4.79  |
| 1PPF | HIS | 52  | 7.5 | 6.28  | 6.29  | 6.47  |
| 1PPF | LYS | 13  | 9.9 | 10.26 | 10.77 | 10.57 |
| 1PPF | LYS | 29  | 11  | 10.03 | 10.16 | 10.17 |
| 1PPF | LYS | 34  | 10  | 10.18 | 10.44 | 10.18 |
| 1PPF | LYS | 55  | 11  | 9.85  | 9.83  | 9.88  |
| 1RGG | ASP | 17  | 3.7 | 3.9   | 3.97  | 4.35  |
| 1RGG | ASP | 25  | 4.9 | 4.28  | 4.33  | 4.83  |
| 1RGG | ASP | 33  | 2.4 | 2.65  | 2.52  | 2.09  |
| 1RGG | ASP | 84  | 3   | 3.2   | 3     | 1.85  |
| 1RGG | ASP | 93  | 3.1 | 3.98  | 4     | 3.98  |
| 1RGG | GLU | 14  | 5.1 | 4.16  | 3.71  | 3.84  |
| 1RGG | GLU | 41  | 4.1 | 4.2   | 3.92  | 4.05  |
| 1RGG | GLU | 54  | 3.4 | 3.93  | 3.52  | 3.7   |
| 1RGG | GLU | 74  | 3.5 | 4.94  | 4.7   | 5.01  |
| 1RGG | GLU | 78  | 3.1 | 4.64  | 4.42  | 4.62  |
| 1RGG | HIS | 53  | 8.3 | 7.16  | 7.32  | 7.25  |
| 1RGG | HIS | 85  | 6.4 | 6.46  | 6.5   | 6.49  |
| 1RQL | LYS | 53  | 9.3 | 10.07 | 10.22 | 10.07 |
| 1STY | HIS | 8   | 6.5 | 6.46  | 6.93  | 6.8   |
| 1STY | HIS | 46  | 5.9 | 6.14  | 6.15  | 6.03  |
| 1STY | HIS | 121 | 5.6 | 6.73  | 6.83  | 6.56  |
| 1STY | HIS | 124 | 6   | 5.81  | 6     | 5.79  |
| 1XNB | ASP | 11  | 2.5 | 3.4   | 2.82  | 2.86  |
| 1XNB | ASP | 101 | 2   | 2.95  | 2.77  | 2.75  |
| 1XNB | ASP | 106 | 2.7 | 3.48  | 3.61  | 4.14  |
| 1XNB | ASP | 119 | 3.2 | 3.38  | 3.46  | 3.17  |
| 1XNB | ASP | 121 | 3.6 | 3.78  | 3.96  | 4.43  |
| 1XNB | GLU | 78  | 4.6 | 4.33  | 3.99  | 4.23  |
| 1XNB | HIS | 156 | 6.5 | 6.26  | 6.45  | 6.23  |
| 2CI2 | ASP | 64  | 3.8 | 3.04  | 3.08  | 2.84  |
| 2CI2 | ASP | 71  | 2.8 | 3.31  | 2.72  | 2.48  |
| 2CI2 | ASP | 74  | 5   | 4.02  | 4.5   | 4.91  |
| 2CI2 | GLU | 23  | 3.2 | 4.26  | 3.9   | 4.09  |
| 2CI2 | GLU | 26  | 3.3 | 3.91  | 3.31  | 3.63  |
| 2CI2 | GLU | 33  | 4.2 | 4.52  | 3.64  | 3.29  |
| 2CI2 | GLU | 34  | 3.8 | 4.49  | 4.22  | 4.19  |
| 2CI2 | GLU | 45  | 3.9 | 4.11  | 3.81  | 4     |
| 2CI2 | GLU | 60  | 3.5 | 4.13  | 3.76  | 4.04  |
| 2CPL | HIS | 54  | 4.2 | 6.1   | 6.14  | 5.99  |
| 2CPL | HIS | 70  | 5.8 | 6.23  | 6.49  | 6.46  |

|      |     |     |      |       |       |       |
|------|-----|-----|------|-------|-------|-------|
| 2CPL | HIS | 92  | 4.2  | 6.53  | 6.57  | 6.15  |
| 2CPL | HIS | 126 | 6.3  | 6.11  | 6.37  | 6.13  |
| 2TGA | HIS | 40  | 4.6  | 7.05  | 7.3   | 5.16  |
| 2TGA | HIS | 57  | 7.3  | 6.87  | 7.03  | 6.98  |
| 3EBX | HIS | 6   | 5.8  | 5.91  | 5.96  | 5.78  |
| 3EBX | HIS | 26  | 5.8  | 5.94  | 5.93  | 5.91  |
| 3RN3 | ASP | 14  | 1.8  | 3.47  | 3.4   | 3.22  |
| 3RN3 | ASP | 38  | 3.5  | 3.53  | 3.47  | 3.84  |
| 3RN3 | ASP | 53  | 3.7  | 3.91  | 4.03  | 3.97  |
| 3RN3 | ASP | 83  | 3.3  | 3.31  | 3.19  | 3.25  |
| 3RN3 | ASP | 121 | 3    | 2.7   | 2.23  | 1.96  |
| 3RN3 | GLU | 2   | 2.6  | 3.49  | 2.88  | 3.02  |
| 3RN3 | GLU | 9   | 4    | 4.46  | 4.17  | 4.41  |
| 3RN3 | GLU | 49  | 4.7  | 4.61  | 4.33  | 4.64  |
| 3RN3 | GLU | 86  | 4    | 4.45  | 4.25  | 4.48  |
| 3RN3 | GLU | 111 | 3.5  | 4.5   | 4.15  | 4.43  |
| 3RN3 | HIS | 12  | 6    | 6.03  | 6.09  | 6.22  |
| 3RN3 | HIS | 48  | 6.1  | 6.22  | 6.78  | 6.2   |
| 3RN3 | HIS | 105 | 6.5  | 6.25  | 6.13  | 6.2   |
| 3RN3 | HIS | 119 | 6.5  | 6.58  | 6.97  | 6.82  |
| 4LZT | ASP | 18  | 2.7  | 3.25  | 2.78  | 3.16  |
| 4LZT | ASP | 48  | 1.6  | 3.41  | 3.38  | 3.1   |
| 4LZT | ASP | 52  | 3.7  | 3.38  | 3.09  | 3.46  |
| 4LZT | ASP | 66  | 0.9  | 2.69  | 2.37  | 1.68  |
| 4LZT | ASP | 87  | 2.1  | 2.82  | 2.48  | 2.29  |
| 4LZT | ASP | 101 | 4.1  | 3.7   | 3.77  | 4.19  |
| 4LZT | ASP | 119 | 3.2  | 3.34  | 3.2   | 3.22  |
| 4LZT | GLU | 7   | 2.9  | 3.85  | 3     | 3.48  |
| 4LZT | GLU | 35  | 6.2  | 4.46  | 4.24  | 4.87  |
| 4LZT | HIS | 15  | 5.4  | 6.48  | 6.52  | 6.25  |
| 4LZT | LYS | 13  | 10.5 | 9.83  | 9.92  | 9.99  |
| 4LZT | LYS | 33  | 10.4 | 10.24 | 10.49 | 10.33 |
| 4LZT | LYS | 96  | 10.8 | 10.23 | 10.29 | 10.48 |
| 4LZT | LYS | 97  | 10.3 | 10.21 | 10.47 | 10.52 |
| 4LZT | LYS | 116 | 10.2 | 9.88  | 10    | 9.86  |
| 4PTI | ASP | 3   | 3.6  | 3.76  | 3.75  | 4.09  |
| 4PTI | ASP | 50  | 3.2  | 3.48  | 3.46  | 3.25  |
| 4PTI | GLU | 7   | 3.9  | 4.08  | 3.61  | 3.91  |
| 4PTI | GLU | 49  | 3.9  | 4.29  | 3.89  | 4.18  |
| 4PTI | LYS | 15  | 10.4 | 10.07 | 10.1  | 10.12 |
| 4PTI | LYS | 26  | 10.4 | 9.99  | 9.98  | 9.96  |
| 4PTI | LYS | 41  | 10.8 | 9.99  | 10.11 | 10.13 |
| 4PTI | LYS | 46  | 10.4 | 9.86  | 9.94  | 9.88  |

2. Predicted pKa values on pKa-cooperative (SNase) dataset with optimal parameters  $\epsilon_{ref} = 8, \sigma = 0.93$ . The calculations are performed with AMBER, CHARMM and PARSE force fields, respectively.

| PDB   | RES_NAME | RES_NUM | EXP_Value | AMBER | CHARMM | PARSE |
|-------|----------|---------|-----------|-------|--------|-------|
| 1STN  | HIS      | 8       | 6.5       | 6.86  | 7.19   | 7.17  |
| 1STN  | HIS      | 121     | 5.3       | 2.22  | 2.64   | 3.08  |
| 1STN  | HIS      | 124     | 5.7       | 5.35  | 5.47   | 5.53  |
| 3BDC  | ASP      | 19      | 2.3       | 5.57  | 3.41   | 0.25  |
| 3BDC  | ASP      | 21      | 6.5       | 6.72  | 4.45   | 6.31  |
| 3BDC  | ASP      | 40      | 3.9       | 5.95  | 5.96   | 6.24  |
| 3BDC  | ASP      | 43      | 4         | 6.5   | 0      | 0     |
| 3BDC  | ASP      | 77      | 1         | 1.77  | 0      | 0     |
| 3BDC  | ASP      | 83      | 1         | 0.3   | 0      | 0     |
| 3BDC  | ASP      | 95      | 2.2       | 2.14  | 5.32   | 5.58  |
| 3BDC  | GLU      | 10      | 2.9       | 4.02  | 7.05   | 6.7   |
| 3BDC  | GLU      | 52      | 4         | 3.58  | 4.15   | 2.5   |
| 3BDC  | GLU      | 57      | 3.6       | 3.88  | 4.14   | 3.1   |
| 3BDC  | GLU      | 67      | 3.8       | 3.03  | 2.12   | 2.06  |
| 3BDC  | GLU      | 73      | 3.9       | 2.87  | 3.57   | 1.87  |
| 3BDC  | GLU      | 75      | 3.3       | 3.1   | 2.02   | 0.8   |
| 3BDC  | GLU      | 101     | 3.9       | 3.8   | 3.56   | 3.71  |
| 3BDC  | GLU      | 122     | 3.9       | 4.28  | 4.87   | 3.81  |
| 3BDC  | GLU      | 129     | 3.8       | 3.19  | 3.5    | 3.2   |
| 3BDC  | GLU      | 135     | 3.8       | 4.63  | 5.03   | 4.44  |
| A109D | ASP      | 109     | 7.5       | 5.58  | 8.51   | 7.47  |
| A109E | GLU      | 109     | 7.9       | 6.61  | 8.02   | 8.5   |
| A109K | LYS      | 109     | >10.5     | 10.18 | 12.74  | 12    |
| A109R | ARG      | 109     | >10.5     | 11.42 | 13.17  | 14    |
| A132D | ASP      | 132     | 7         | 6.88  | 9.12   | 8.27  |
| A132E | GLU      | 132     | 7         | 7.32  | 8.91   | 8.03  |
| A132K | LYS      | 132     | >10.4     | 12.07 | 13.41  | 12.46 |
| A132R | ARG      | 132     | >10.4     | 13.19 | 12.96  | 14    |
| A58D  | ASP      | 58      | 6.8       | 7.46  | 7.08   | 6.82  |
| A58E  | GLU      | 58      | 7.7       | 7.28  | 7.54   | 8.18  |
| A58K  | LYS      | 58      | 10.4      | 10.15 | 11.39  | 11.62 |
| A58R  | ARG      | 58      | >10.4     | 12.7  | 12.41  | 14    |
| A90D  | ASP      | 90      | 7.5       | 5.77  | 6.21   | 6.23  |
| A90E  | GLU      | 90      | 6.4       | 4.77  | 5.8    | 5.3   |
| A90K  | LYS      | 90      | 8.6       | 8.07  | 9.28   | 8.8   |
| A90R  | ARG      | 90      | 10.5      | 10.5  | 13.12  | 13.92 |
| F34D  | ASP      | 34      | 7.8       | 5.06  | 6.41   | 5.5   |
| F34E  | GLU      | 34      | 7.3       | 5.19  | 6.45   | 6.23  |
| F34K  | LYS      | 34      | >10.4     | 8.53  | 9.45   | 9.13  |
| F34R  | ARG      | 34      | >10.4     | 11.08 | 12.22  | 12.09 |
| I72D  | ASP      | 72      | 7.6       | 5.31  | 7.99   | 5.87  |
| I72E  | GLU      | 72      | 7.3       | 5.48  | 6.44   | 6.83  |
| I72R  | ARG      | 72      | 10.8      | 10.93 | 11.95  | 14    |
| I92D  | ASP      | 92      | 7.1       | 6.18  | 6.69   | 5.94  |

|       |     |     |       |       |       |       |
|-------|-----|-----|-------|-------|-------|-------|
| I92E  | GLU | 92  | 9     | 6.16  | 7.87  | 8.09  |
| I92K  | LYS | 92  | 5.3   | 5.53  | 6.57  | 6.29  |
| L103D | ASP | 103 | 8.7   | 5.84  | 6.94  | 5.94  |
| L103E | GLU | 103 | 8.9   | 6.67  | 8.11  | 7.25  |
| L103R | ARG | 103 | >10.4 | 9.41  | 10.4  | 13.32 |
| L125D | ASP | 125 | 7.6   | 5.53  | 6.43  | 4.25  |
| L125E | GLU | 125 | 9.1   | 6.17  | 6.96  | 7.29  |
| L125R | ARG | 125 | >10.4 | 11.15 | 12.86 | 12.86 |
| L25D  | ASP | 25  | 6.8   | 5.47  | 6.56  | 5.14  |
| L25E  | GLU | 25  | 7.5   | 6.02  | 7.43  | 6.57  |
| L25K  | LYS | 25  | 6.3   | 7.41  | 8.26  | 7.5   |
| L25R  | ARG | 25  | >10.4 | 9.75  | 11.94 | 11.07 |
| L36D  | ASP | 36  | 7.9   | 4.42  | 5.81  | 3.76  |
| L36E  | GLU | 36  | 8.7   | 5.82  | 7.41  | 5.29  |
| L36R  | ARG | 36  | >10.4 | 10.49 | 12.18 | 14    |
| L37D  | ASP | 37  | <4    | 4.39  | 8.03  | 6.52  |
| L37E  | GLU | 37  | 5.2   | 5.15  | 7.42  | 4.36  |
| L37K  | LYS | 37  | >10.4 | 10.89 | 14    | 10.98 |
| L37R  | ARG | 37  | >10.4 | 9.49  | 11.6  | 11.69 |
| L38D  | ASP | 38  | 6.8   | 5.93  | 5.81  | 6.36  |
| L38E  | GLU | 38  | 7     | 6.45  | 2.77  | 8     |
| L38K  | LYS | 38  | 10.6  | 10.75 | 12.32 | 11.06 |
| L38R  | ARG | 38  | 10.4  | 8.74  | 11.7  | 12.18 |
| N118D | ASP | 118 | 7     | 5.15  | 7.53  | 7.01  |
| N118E | GLU | 118 | <4.5  | 5.01  | 5.86  | 4.98  |
| N118K | LYS | 118 | >10.4 | 9.46  | 11.22 | 9.47  |
| N118R | ARG | 118 | >10.4 | 11.76 | 12.93 | 12.01 |
| T62D  | ASP | 62  | 8.7   | 6.44  | 8.06  | 7.74  |
| T62E  | GLU | 62  | 7.7   | 6.44  | 8.12  | 7.24  |
| T62K  | LYS | 62  | 8.1   | 8.86  | 10.87 | 10.18 |
| T62R  | ARG | 62  | >10.4 | 7.47  | 10.89 | 14    |
| V104D | ASP | 104 | 9.7   | 6.9   | 5.39  | 5.86  |
| V104E | GLU | 104 | 9.4   | 6.65  | 7.79  | 7.96  |
| V104K | LYS | 104 | 7.7   | 8.89  | 10.56 | 10.94 |
| V104R | ARG | 104 | >10.4 | 10.89 | 14    | 13.82 |
| V23D  | ASP | 23  | 6.8   | 4.88  | 7.14  | 6.27  |
| V23E  | GLU | 23  | 7.1   | 5.5   | 6.9   | 5.17  |
| V23K  | LYS | 23  | 7.3   | 8.01  | 8.83  | 8.04  |
| V23R  | ARG | 23  | >10.4 | 8.8   | 12.49 | 12.21 |
| V39D  | ASP | 39  | 8.1   | 5.39  | 7.07  | 6.59  |
| V39E  | GLU | 39  | 8.2   | 5.56  | 6.83  | 8.15  |
| V39K  | LYS | 39  | 9     | 9.66  | 12.75 | 11.12 |
| V39R  | ARG | 39  | >10.4 | 8.14  | 13.19 | 14    |
| V66D  | ASP | 66  | 8.7   | 6     | 6.53  | 5.69  |
| V66E  | GLU | 66  | 8.5   | 6.42  | 7.48  | 7.04  |
| V66K  | LYS | 66  | 8.5   | 6.03  | 6.99  | 7.54  |
| V74D  | ASP | 74  | 8.3   | 5.75  | 6.02  | 5.07  |
| V74E  | GLU | 74  | 7.8   | 6.79  | 3.86  | 7.57  |
| V74K  | LYS | 74  | 7.4   | 7.42  | 7.77  | 8.73  |
| V74R  | ARG | 74  | >10.4 | 12.5  | 10.49 | 12.18 |
| V99D  | ASP | 99  | 8.5   | 5.53  | 5.12  | 5.57  |
| V99E  | GLU | 99  | 8.4   | 6.4   | 7.02  | 6.59  |
| V99K  | LYS | 99  | 6.5   | 8.32  | 10.09 | 9.19  |



|      |     |    |       |       |       |       |
|------|-----|----|-------|-------|-------|-------|
| V99R | ARG | 99 | >10.4 | 8.21  | 11.09 | 13.34 |
| Y91D | ASP | 91 | 7.2   | 4.34  | 3.58  | 2.88  |
| Y91E | GLU | 91 | 7.1   | 6.28  | 11.19 | 6.89  |
| Y91R | ARG | 91 | >10.4 | 10.93 | 13.34 | 12.6  |

### 3. Topology information of nucleic acids

```
# res atom obtal conf batm batm batm batm
$ A P sp3 SD OP1 OP2 O3' O5'
$ A OP1 s SD P
$ A OP2 s SD P
$ A O5' sp3 SD P C5'
$ A C5' sp3 SD O5' C4' H5' H5''
$ A C4' sp3 SD C5' O4' C3' H4'
$ A O4' sp3 SD C4' C1'
$ A C3' sp3 SD C4' O3' C2' H3'
$ A O3' sp3 SD C3' P
$ A C2' sp3 SD C3' O2' C1' H2'
$ A O2' sp3 SD C2' HO2'
$ A C1' sp3 SD O4' C2' N9 H1'
$ A N9 sp2 SD C1' C8 C4
$ A C8 sp2 SD N9 N7 H8
$ A N7 sp2 SD C8 C5
$ A C5 sp2 SD N7 C6 C4
$ A C6 sp2 SD C5 N6 N1
$ A N6 sp2 SD C6 H61 H62
$ A N1 sp2 SD C6 C2 H1
$ A C2 sp2 SD N1 N3 H2
$ A N3 sp2 SD C2 C4
$ A C4 sp2 SD N9 C5 N3
$ A H5' s SD C5'
$ A H5'' s SD C5'
$ A H4' s SD C4'
$ A H3' s SD C3'
$ A H2' s SD C2'
$ A HO2' s SD O2'
$ A H1' s SD C1'
$ A H8 s SD C8
$ A H61 s SD N6
$ A H62 s SD N6
$ A H2 s SD C2
$ A H1 s SD N1
```

```
# res atom obtal conf batm batm batm batm
$ C P sp3 SD O5' OP1 OP2 O3'
$ C OP1 s SD P
$ C OP2 s SD P
$ C C5' sp3 SD C4' O5' H5' H5''
```

\$ C O5' sp3 SD C5' P  
 \$ C C4' sp3 SD C3' O4' C5' H4'  
 \$ C O4' sp3 SD C1' C4'  
 \$ C C3' sp3 SD C2' C4' O3' H3'  
 \$ C O3' sp3 SD C3' P  
 \$ C C2' sp3 SD C1' O2' C3' H2'  
 \$ C O2' sp3 SD C2' HO2'  
 \$ C C1' sp3 SD N1 C2' O4' H1'  
 \$ C N1 sp2 SD C2 C6 C1'  
 \$ C C2 sp2 SD N1 N3 O2  
 \$ C N3 sp2 SD C2 C4 H3  
 \$ C C4 sp2 SD N3 C5 N4  
 \$ C C5 sp2 SD C4 C6 H5  
 \$ C C6 sp2 SD N1 C5 H6  
 \$ C O2 s SD C2  
 \$ C N4 sp2 SD C4 H41 H42  
 \$ C H1' s SD C1'  
 \$ C H2' s SD C2'  
 \$ C H3' s SD C3'  
 \$ C H4' s SD C4'  
 \$ C HO2' s SD O2'  
 \$ C H5' s SD C5'  
 \$ C H5'' s SD C5'  
 \$ C H41 s SD N4  
 \$ C H42 s SD N4  
 \$ C H3 s SD N3  
 \$ C H5 s SD C5  
 \$ C H6 s SD C6

# res atom obtal conf batm batm batm batm

\$ G P sp3 SD OP1 OP2 O3' O5'  
 \$ G OP1 s SD P  
 \$ G OP2 s SD P  
 \$ G O5' sp3 SD P C5'  
 \$ G C5' sp3 SD O5' C4' H5' H5''  
 \$ G C4' sp3 SD C5' O4' C3' H4'  
 \$ G O4' sp3 SD C4' C1'  
 \$ G C3' sp3 SD C4' O3' C2' H3'  
 \$ G O3' sp3 SD C3' P  
 \$ G C2' sp3 SD C3' O2' C1' H2'  
 \$ G O2' sp3 SD C2' HO2'  
 \$ G C1' sp3 SD O4' C2' N9 H1'  
 \$ G N9 sp2 SD C1' C8 C4

\$ G C8 sp2 SD N9 N7 H8  
 \$ G N7 sp2 SD C8 C5  
 \$ G C5 sp2 SD N7 C6 C4  
 \$ G C6 sp2 SD C5 O6 N1  
 \$ G O6 s SD C6  
 \$ G N1 sp2 SD C6 C2 H1  
 \$ G C2 sp2 SD N1 N3 N3  
 \$ G N2 sp2 SD C2 H21 H22  
 \$ G N3 sp2 SD C2 C4  
 \$ G C4 sp2 SD N9 C5 N3  
 \$ G H1' s SD C1'  
 \$ G H2' s SD C2'  
 \$ G H3' s SD C3'  
 \$ G H4' s SD C4'  
 \$ G HO2' s SD O2'  
 \$ G H5' s SD C5'  
 \$ G H5'' s SD C5'  
 \$ G H8 s SD C8  
 \$ G H1 s SD N1  
 \$ G H21 s SD N2  
 \$ G H22 s SD N2

# res atom obtal conf batm batm batm batm

\$ U P sp3 SD O5' OP1 OP2 O3'  
 \$ U OP1 s SD P  
 \$ U OP2 s SD P  
 \$ U O5' sp3 SD C5' P  
 \$ U C5' sp3 SD C4' O5' H5' H5''  
 \$ U C4' sp3 SD C3' O4' C5' H4'  
 \$ U O4' sp3 SD C1' C4'  
 \$ U C3' sp3 SD C2' C4' O3' H3'  
 \$ U O3' sp3 SD C3' P  
 \$ U C2' sp3 SD C1' C3' O2' H2'  
 \$ U O2' sp3 SD C2' HO2'  
 \$ U C1' sp3 SD N1 C2' O4' H1'  
 \$ U N1 sp2 SD C2 C6 C1'  
 \$ U C2 sp2 SD N1 N3 O2  
 \$ U N3 sp2 SD C2 C4 H3  
 \$ U C4 sp2 SD N3 C5 O4  
 \$ U C5 sp2 SD C4 C6 H5  
 \$ U C6 sp2 SD N1 C5 H6  
 \$ U O2 s SD C2  
 \$ U O4 s SD C4

\$ U H1' s SD C1'  
\$ U H2' s SD C2'  
\$ U HO2' s SD O2'  
\$ U H3' s SD C3'  
\$ U H4' s SD C4'  
\$ U H5' s SD C5'  
\$ U H5'' s SD C5'  
\$ U H3 s SD N3  
\$ U H5 s SD C5  
\$ U H6 s SD C6
